# Supplementary material for: Biofilm-Forming Abilities of Listeria monocytogenes Serotypes Isolated from Different Sources
Source: PubMed Central journal article supplement (PMC4567129; doi:10.1371/journal.pone.0137046), 2015-09-11
Supplement: pone.0137046.s001.pdf [file pone.0137046.s001.pdf]

**S1 Table. List of isolates used in this study.** All the isolates were obtained from Indian *Listeria* Culture Collection (ILCC), ICAR Research Complex for Goa, Goa, India.

The cultures are now available with Indian *Listeria* Culture Collection, Centre of Excellence and Innovation in Biotechnology on “Translation Centre for Molecular Epidemiology of *Listeria monocytogenes*”.

| <b>ILCC Id</b> | <b>Serotype</b> | <b>Source</b> | <b>Place of Isolation</b> | <b>Year of isolation</b> | <b>Reference</b>     |
|----------------|-----------------|---------------|---------------------------|--------------------------|----------------------|
| ILCC005        | 1/2a            | Animal        | Goa                       | 2001                     | Unpublished          |
| ILCC026        | 4b              | Human         | Goa                       | 2006                     | Kalekar et al., 2011 |
| ILCC027        | 1/2b            | Human         | Goa                       | 2006                     | Kalekar et al., 2011 |
| ILCC040        | 1/2b            | Human         | Kolhapur                  | 2001                     | Unpublished          |
| ILCC041        | 1/2a            | Animal        | Mumbai                    | 2005                     | Unpublished          |
| ILCC041a       | 1/2a            | Animal        | Mumbai                    | 2005                     | Unpublished          |
| ILCC046        | 4b              | Animal        | Mumbai                    | 2005                     | Unpublished          |
| ILCC047        | 4b              | Animal        | Mumbai                    | 2010                     | Raorane et al., 2014 |
| ILCC048        | 4b              | Animal        | Mumbai                    | 2010                     | Raorane et al., 2014 |
| ILCC049        | 4b              | Animal        | Mumbai                    | 2010                     | Raorane et al., 2014 |
| ILCC050        | 4b              | Animal        | Mumbai                    | 2010                     | Raorane et al., 2014 |
| ILCC094        | 4b              | Human         | Pondicherry               | 2006                     | Kalekar et al., 2011 |
| ILCC094a       | 4b              | Human         | Pondicherry               | 2006                     | Kalekar et al., 2011 |
| ILCC095        | 1/2b            | Human         | Agra                      | 2012                     | Unpublished          |
| ILCC097        | 1/2b            | Human         | Agra                      | 2012                     | Unpublished          |
| ILCC098        | 4b              | Human         | Agra                      | 2006                     | Kalekar et al., 2011 |
| ILCC099        | 1/2b            | Human         | Pondicherry               | 2006                     | Unpublished          |

|         |      |        |           |      |                         |
|---------|------|--------|-----------|------|-------------------------|
| ILCC115 | 4b   | Animal | Izatnagar | 2006 | Shakuntala et al., 2006 |
| ILCC140 | 1/2b | Human  | Kolhapur  | 2006 | Kalekar et al., 2011    |
| ILCC142 | 4b   | Human  | Mumbai    | 2005 | Kalekar et al., 2011    |
| ILCC143 | 4b   | Animal | Izatnagar | 2006 | Shakuntala et al., 2006 |
| ILCC144 | 4b   | Animal | Goa       | 2001 | Unpublished             |
| ILCC146 | 4b   | Animal | Mumbai    | 2005 | Unpublished             |
| ILCC147 | 4b   | Animal | Mumbai    | 2005 | Unpublished             |
| ILCC149 | 1/2a | Animal | Mumbai    | 2005 | Unpublished             |
| ILCC151 | 1/2a | Meat   | Mumbai    | 2004 | Unpublished             |
| ILCC154 | 4b   | Meat   | Goa       | 2006 | Doijad et al., 2010     |
| ILCC155 | 1/2a | Meat   | Goa       | 2006 | Doijad et al., 2010     |
| ILCC158 | 1/2a | Meat   | Goa       | 2006 | Doijad et al., 2010     |
| ILCC159 | 1/2a | Meat   | Goa       | 2006 | Doijad et al., 2010     |
| ILCC160 | 1/2a | Meat   | Goa       | 2006 | Doijad et al., 2010     |
| ILCC161 | 4b   | Meat   | Goa       | 2006 | Doijad et al., 2010     |
| ILCC163 | 1/2a | Meat   | Goa       | 2006 | Doijad et al., 2010     |
| ILCC164 | 1/2a | Meat   | Goa       | 2006 | Doijad et al., 2010     |
| ILCC165 | 4b   | Animal | Kolhapur  | 2001 | Unpublished             |
| ILCC166 | 1/2a | Meat   | Goa       | 2006 | Doijad et al., 2010     |
| ILCC171 | 4b   | Animal | Nagpur    | 2006 | Kalorey et al., 2008    |
| ILCC172 | 4b   | Animal | Nagpur    | 2006 | Kalorey et al., 2006    |
| ILCC173 | 4b   | Animal | Nagpur    | 2006 | Kalorey et al., 2008    |
| ILCC174 | 4b   | Animal | Nagpur    | 2006 | Kalorey et al., 2006    |
| ILCC175 | 4b   | Animal | Anand     | 2009 | Yadava and Roy 2009     |

|         |      |        |           |      |                         |
|---------|------|--------|-----------|------|-------------------------|
| ILCC177 | 4b   | Animal | Anand     | 2009 | Yadava and Roy 2009     |
| ILCC180 | 4b   | Human  | Goa       | 2009 | Kalekar et al., 2011    |
| ILCC181 | 4b   | Animal | Anand     | 2009 | Yadava and Roy 2009     |
| ILCC182 | 4b   | Animal | Anand     | 2009 | Yadava and Roy 2009     |
| ILCC243 | 4b   | Animal | Anand     | 2009 | Yadava and Roy 2009     |
| ILCC249 | 4b   | Milk   | Nagpur    | 2008 | Kalorey et al., 2008    |
| ILCC264 | 4b   | Milk   | Nagpur    | 2008 | Kalorey et al., 2008    |
| ILCC276 | 4b   | Animal | Izatnagar | 2001 | Shakuntala et al., 2006 |
| ILCC283 | 1/2b | Milk   | Mumbai    | 2004 | Unpublished             |
| ILCC284 | 1/2b | Milk   | Mumbai    | 2004 | Unpublished             |
| ILCC285 | 1/2b | Milk   | Mumbai    | 2004 | Unpublished             |
| ILCC289 | 1/2b | Milk   | Mumbai    | 2004 | Unpublished             |
| ILCC291 | 1/2b | Milk   | Mumbai    | 2004 | Unpublished             |
| ILCC297 | 1/2b | Milk   | Mumbai    | 2004 | Unpublished             |
| ILCC298 | 1/2b | Milk   | Mumbai    | 2004 | Unpublished             |
| ILCC299 | 1/2a | Milk   | Mumbai    | 2004 | Unpublished             |
| ILCC300 | 1/2b | Milk   | Mumbai    | 2004 | Unpublished             |
| ILCC301 | 1/2a | Milk   | Mumbai    | 2004 | Unpublished             |
| ILCC302 | 1/2a | Milk   | Mumbai    | 2004 | Unpublished             |
| ILCC303 | 1/2a | Milk   | Mumbai    | 2004 | Unpublished             |
| ILCC304 | 1/2a | Milk   | Mumbai    | 2004 | Unpublished             |
| ILCC306 | 1/2a | Milk   | Mumbai    | 2004 | Unpublished             |
| ILCC307 | 1/2a | Milk   | Mumbai    | 2004 | Unpublished             |
| ILCC309 | 1/2b | Milk   | Mumbai    | 2004 | Unpublished             |

|         |      |        |           |      |                         |
|---------|------|--------|-----------|------|-------------------------|
| ILCC312 | 1/2a | Milk   | Mumbai    | 2004 | Unpublished             |
| ILCC317 | 1/2a | Milk   | Goa       | 2007 | Parihar et al., 2007    |
| ILCC325 | 1/2a | Milk   | Goa       | 2007 | Parihar et al., 2007    |
| ILCC336 | 1/2a | Milk   | Goa       | 2007 | Parihar et al., 2007    |
| ILCC373 | 1/2a | Milk   | Kolhapur  | 2010 | Doijad et al., 2011     |
| ILCC379 | 1/2a | Milk   | Kolhapur  | 2010 | Doijad et al., 2011     |
| ILCC395 | 1/2b | Milk   | Kolhapur  | 2001 | Unpublished             |
| ILCC400 | 1/2a | Milk   | Goa       | 2009 | D'costa et al., 2012    |
| ILCC405 | 1/2a | Milk   | Goa       | 2009 | D'costa et al., 2012    |
| ILCC416 | 1/2b | Milk   | Goa       | 2009 | Dcosta et al., 2012     |
| ILCC419 | 1/2b | Milk   | Goa       | 2009 | D'costa et al., 2012    |
| ILCC468 | 4b   | Meat   | Izatnagar | 2001 | Barbuddhe et al., 2000  |
| ILCC470 | 4b   | Meat   | Izatnagar | 1997 | Barbuddhe et al., 2000  |
| ILCC471 | 4b   | Meat   | Izatnagar | 1997 | Barbuddhe et al., 2000  |
| ILCC474 | 4b   | Meat   | Izatnagar | 1997 | Barbuddhe et al., 2000  |
| ILCC491 | 4b   | Animal | Izatnagar | 1997 | Barbuddhe et al., 2000  |
| ILCC492 | 4b   | Animal | Mumbai    | 2005 | Unpublished             |
| ILCC493 | 4b   | Animal | Izatnagar | 1997 | Barbuddhe et al., 2000  |
| ILCC494 | 4b   | Animal | Nagpur    | 2006 | Kalorey et al., 2008    |
| ILCC496 | 4b   | Animal | Izatnagar | 2006 | Shakuntala et al., 2006 |
| ILCC498 | 4b   | Animal | Izatnagar | 2006 | Shakuntala et al., 2006 |
| ILCC499 | 4b   | Animal | Izatnagar | 2006 | Shakuntala et al., 2006 |
| ILCC519 | 1/2a | Milk   | Kolhapur  | 2010 | Doijad et al., 2011     |
| ILCC530 | 1/2a | Milk   | Kolhapur  | 2010 | Doijad et al., 2011     |

|         |      |       |        |      |                      |
|---------|------|-------|--------|------|----------------------|
| ILCC531 | 1/2a | Milk  | Goa    | 2007 | Parihar et al., 2007 |
| ILCC535 | 1/2a | Milk  | Goa    | 2009 | D'costa et al., 2012 |
| ILCC540 | 1/2a | Milk  | Goa    | 2009 | D'costa et al., 2012 |
| ILCC557 | 4b   | Human | Mumbai | 2005 | Kalekar et al., 2011 |
| ILCC559 | 1/2b | Human | Nagpur | 2008 | Unpublished          |
| ILCC562 | 4b   | Human | Mumbai | 2005 | Kalekar et al., 2011 |
| ILCC564 | 4b   | Human | Mumbai | 2005 | Kalekar et al., 2011 |
| ILCC567 | 4b   | Human | Mumbai | 2005 | Kalekar et al., 2011 |
| ILCC569 | 1/2b | Human | Nagpur | 2008 | Unpublished          |

## References

- Barbuddhe SB, Malik SVS, Bhilegaonkar KN, Kumar P, Gupta LK. Isolation of *Listeria monocytogenes* and anti-listeriolysin O detection in sheep and goats. *Small Rum Res.* 2000; 38:151-5. doi:10.1016/S0921-4488(00)00155-3
- D'Costa D, Bhosle SN, Dhuri RB, Kalekar S, Rodrigues J, Doijad SP, Barbuddhe SB. The occurrence and characterization of *Listeria* species isolated from milk production chain. *Milchwissenschaft.* 2012; 67: 43-6.
- Doijad, S. P., Vaidya, V., Garg, S., Kalekar, S., Rodrigues J., D'Costa, D., Bhosle, S. and Barbuddhe S.B. Isolation and characterization of *Listeria* species from raw and processed meats. *J Vet Public Hlth.* 2010; 8(2): 83-8.
- Doijad, S. P., Barbuddhe S.B., Garg, S., Kalekar, S., Rodrigues J., D'Costa, D., Bhosle, S. and Chakraborty, T. Incidence and genetic variability of *Listeria* species from three milk processing plants. *Food Cont.* 2010; 22: 1900-04. doi:10.1016/j.foodcont.2011.05.001
- Kalekar S, Rodrigues J, D'Costa D, Doijad SP, Jangam AK, Malik SVS, Kalorey DR, Rawool DB, Hain T, Chakraborty T, Barbuddhe SB. Genotypic characterization of *Listeria*

*monocytogenes* isolated from humans in India. *Ann Trop Med Parasitol*. 2011; 105(5):351-8.  
doi: 10.1179/1364859411Y.0000000023.

Kalorey DR, Kurkure NV, Warke SR, Rawool DB, Malik SVS, Barbuddhe SB. Isolation of pathogenic *Listeria monocytogenes* in faeces of wild animals in captivity. *Comp Immunol Microbiol Infect Dis*. 2006; 29(5-6):295-300. doi:10.1016/j.cimid.2006.07.002

Kalorey DR, Kurkure NV, Warke SR, Rawool DB, Barbuddhe SB. *Listeria* species in bovine raw milk: a large survey of Central India. *Food Cont*. 2008; 19:109-12.  
doi:10.1016/j.cimid.2006.07.002.

Parihar VS, Barbuddhe SB, Chakurkar EB, Danielson-Tham M-L, Tham W. Isolation of *Listeria* species from farm bulk milk at the receiving dairy plant and cervico-vaginal samples from dairy cows. *Indian J Comp Microbiol Immunol Infect Dis*. 2007; 28: 53-5.

Raorane A, Doijad S, Katkar S, Pathak A, Poharkar K, Dubal ZB, Barbuddhe SB. Prevalence of *Listeria* spp. in Animals and Associated Environment. *Adv Anim Vet Sci*. 2014; 2 (2): 81–5.

Shakuntala I, Malik, SVS, Barbuddhe SB, Rawool DB. 2006. Isolation of *Listeria monocytogenes* from buffaloes with reproductive disorders and its confirmation by polymerase chain reaction. *Vet Microbiol*. 2006; 117(2-4): 229-34. doi:10.1016/j.vetmic.2006.06.018

Yadava MM, Roy A. Prevalence of *Listeria* spp including *Listeria monocytogenes* from apparently healthy sheep of Gujarat State, India. *Zoonoses Public Health*. 2009; 56(9-10):515-24. doi: 10.1111/j.1863-2378.2008.01201.x.
